# Supplementary material
Source: ML conference proceedings conference paper supplement (https://www.ecva.net/papers/eccv_2020/papers_ECCV/html/123750222_ECCV_2020_paper.php)
Supplement: Supplementary file 2 [file 123750222-supp.zip]

Archive with 5 entries (4 files):
- An_Asymmetric_Modeling_for_Action_Assessment_supplementary/An_Asymmetric_Modeling_for_Action_Assessment_supplementary.pdf
- An_Asymmetric_Modeling_for_Action_Assessment_supplementary/video_demos/
- An_Asymmetric_Modeling_for_Action_Assessment_supplementary/video_demos/Knot_Tying_B004_capture1.mp4
- An_Asymmetric_Modeling_for_Action_Assessment_supplementary/video_demos/Needle_Passing_B004_capture1.mp4
- An_Asymmetric_Modeling_for_Action_Assessment_supplementary/video_demos/Suturing_B004_capture1.mp4
